# Supplementary material
Source: PubMed Central journal article supplement (PMC3856800)
Supplement: 1313825110_pnas.201313825SI.pdf [file 1313825110_pnas.201313825SI.pdf]

# Supporting Information

Huang et al. 10.1073/pnas.1313825110

Table S1. Demographic characteristic variables of respondents

| Demographic characteristic variables                                | Survey 1 (before FNA),<br><i>n</i> = 300 (%) | Survey 2 (after FNA),<br><i>n</i> = 368 (%) | Population of<br>Lianyungang,<br><i>N</i> = 4 million (%) |
|---------------------------------------------------------------------|----------------------------------------------|---------------------------------------------|-----------------------------------------------------------|
| Sex                                                                 |                                              |                                             |                                                           |
| Male                                                                | 47                                           | 52                                          | 51                                                        |
| Female                                                              | 53                                           | 48                                          | 49                                                        |
| Age, y                                                              |                                              |                                             |                                                           |
| 18–34                                                               | 50                                           | 45                                          | 37                                                        |
| ≥35                                                                 | 50                                           | 55                                          | 63                                                        |
| Education                                                           |                                              |                                             |                                                           |
| Junior high and below                                               | 39                                           | 34                                          | 78.7                                                      |
| High school                                                         | 52                                           | 51                                          | 14.1                                                      |
| College and above                                                   | 9                                            | 15                                          | 7.2                                                       |
| Occupation                                                          |                                              |                                             |                                                           |
| Public service (civil servants, teachers,<br>other state employees) | 17                                           | 15                                          | 39                                                        |
| Other                                                               | 83                                           | 85                                          | 61                                                        |
| Household monthly income, yuan                                      |                                              |                                             |                                                           |
| ≤2,000                                                              | 16                                           | 14                                          | 20                                                        |
| >2,000                                                              | 84                                           | 86                                          | 80                                                        |
| Residence, distance (km)                                            |                                              |                                             |                                                           |
| Close (<20)                                                         | 36                                           | 27                                          | —*                                                        |
| Moderate (20–40)                                                    | 28                                           | 52                                          | —                                                         |
| Remote (>40)                                                        | 36                                           | 21                                          | —                                                         |

\*Instead of by distance, the local Statistical Yearbook divides the area into districts and counties, and it shows that 24% of residents live in districts and 76% in counties. In survey 1, 31% of residents live in districts and 69% in counties; in survey 2, 27% live in districts and 73% in counties. These results are generally consistent with local population characteristics.

**Table S2. Risk perception questionnaire (scale of 1–5)**

| Question topic | Question ID | Description of questions                                                                                                                                               |
|----------------|-------------|------------------------------------------------------------------------------------------------------------------------------------------------------------------------|
| Acceptance     | 1           | Nuclear power should be used in our country.                                                                                                                           |
|                | 2           | We should quickly increase the number of nuclear power stations in China.                                                                                              |
|                | 3           | If there is a vote for promotion of nuclear power, I will strongly vote for it.                                                                                        |
| Knowledge      | 4           | I strongly welcome construction of nuclear power stations in my dwelling city, such as Lianyungang.                                                                    |
|                | 5           | I want detailed information on the past troubles and accidents at nuclear power stations.                                                                              |
|                | 6           | I am interested in the influences, contributions, and problems that nuclear power presents to modern society.                                                          |
|                | 7           | I often watch TV news and read news about nuclear power.                                                                                                               |
|                | 8           | I know how mechanisms of nuclear power generation operate.                                                                                                             |
| Perceived risk | 9           | I am very familiar with nuclear power.                                                                                                                                 |
|                | 10          | I'm worried that an accident accompanied by environmental pollution, property loss, or health damage may occur in the "Tianwan" nuclear power plant in the future.     |
|                | 11          | Nuclear power plant accidents accompanied by environmental pollution, property loss, or health damage occur frequently.                                                |
|                | 12          | Within my lifetime, a severe nuclear power plant accident will eventually occur somewhere in the world, accompanied by serious health damage or massive property loss. |
|                | 13          | A severe accident accompanied by serious health damage or massive property loss at a nuclear power plant will eventually occur in China as well.                       |
|                | 14          | If you are a resident of the city constructing a nuclear power station, you feel very terrified.                                                                       |
|                | 15          | If a nuclear power accident happens in your city, the danger is catastrophic and dreadful to you.                                                                      |
| Benefit        | 16          | The risk degree of nuclear power plant accidents is greater than that of traffic accidents.                                                                            |
|                | 17          | Nuclear power generators can produce a greater amount of electricity and at a lower cost than thermal power can.                                                       |
|                | 18          | We can use electricity at a low price with nuclear power.                                                                                                              |
|                | 19          | Nuclear power generation can provide a great amount of electricity with a small amount of fuel.                                                                        |
| Trust          | 20          | Nuclear power stations could increase the residents' employment opportunity and revenue.                                                                               |
|                | 21          | Nuclear power stations could promote the local economic growth from the resulting construction boom.                                                                   |
|                | 22          | We can trust electric power companies with nuclear power without anxiety.                                                                                              |
|                | 23          | Nuclear power generation is efficient and safe.                                                                                                                        |
|                | 24          | Electric power companies propagate all points of nuclear power generation to the public.                                                                               |
|                | 25          | The nuclear policy of the government is trustworthy.                                                                                                                   |
|                | 26          | The local government openly provides the public with information about nuclear power.                                                                                  |
|                | 27          | We can trust that government has the ability to deal with the happened nuclear power accidents.                                                                        |

Values range from "do not agree at all" (1) to "do not agree" (2), "neutral" (3), "agree" (4), and "totally agree" (5).

**Table S3. Comparison of before and after the accident, confirmatory factor loading, and reliability of scales**

| Question topic  | Question ID | Survey 1<br>(before FNA),<br><i>n</i> = 300 |      | Survey 2 (after<br>FNA), <i>n</i> = 368 |      | Difference between<br>surveys, <i>t</i> test | Factor<br>loading | Communality |
|-----------------|-------------|---------------------------------------------|------|-----------------------------------------|------|----------------------------------------------|-------------------|-------------|
|                 |             | Mean                                        | SD   | Mean                                    | SD   |                                              |                   |             |
| Risk acceptance | 1           | 3.67                                        | 1.26 | 3.10                                    | 1.19 | -6.05***                                     | 0.77 <sup>a</sup> | 0.65        |
|                 | 2           | 3.21                                        | 1.35 | 2.57                                    | 1.10 | -6.55***                                     | 0.81              | 0.72        |
|                 | 3           | 3.37                                        | 1.33 | 2.79                                    | 1.25 | -5.75***                                     | 0.78              | 0.67        |
|                 | 4           | 3.11                                        | 0.93 | 2.13                                    | 1.14 | -12.22***                                    | 0.72              | 0.56        |
| Knowledge       | 5           | 2.79                                        | 1.11 | 2.97                                    | 1.00 | 2.22*                                        | 0.46              | 0.45        |
|                 | 6           | 2.67                                        | 1.12 | 3.09                                    | 0.94 | 5.18***                                      | 0.47              | 0.64        |
|                 | 7           | 2.42                                        | 1.07 | 3.18                                    | 1.02 | 9.29***                                      | 0.44              | 0.83        |
|                 | 8           | 2.46                                        | 1.12 | 2.51                                    | 1.00 | 0.58                                         | 0.62              | 0.83        |
|                 | 9           | 2.28                                        | 1.02 | 2.50                                    | 0.97 | 2.82**                                       | 0.52              | 0.72        |
| Perceived risk  | 10          | 2.90                                        | 1.29 | 4.42                                    | 0.92 | 17.02***                                     | -0.83             | 0.83        |
|                 | 11          | 2.12                                        | 1.15 | 4.55                                    | 0.68 | 32.27***                                     | -0.79             | 0.88        |
|                 | 12          | 2.86                                        | 1.46 | 4.87                                    | 0.35 | 23.35***                                     | -0.80             | 0.89        |
|                 | 13          | 3.03                                        | 1.36 | 4.78                                    | 0.53 | 21.01***                                     | -0.84             | 0.93        |
|                 | 14          | 2.99                                        | 1.29 | 4.47                                    | 0.80 | 17.42***                                     | -0.83             | 0.86        |
|                 | 15          | 2.94                                        | 1.21 | 4.57                                    | 0.66 | 20.93***                                     | -0.82             | 0.88        |
|                 | 16          | 2.91                                        | 1.19 | 4.64                                    | 0.65 | 22.70***                                     | -0.82             | 0.89        |
| Benefit         | 17          | 3.13                                        | 1.07 | 2.39                                    | 1.02 | -9.22***                                     | 0.81              | 0.82        |
|                 | 18          | 3.34                                        | 1.03 | 2.64                                    | 1.14 | -8.38***                                     | 0.81              | 0.86        |
|                 | 19          | 3.12                                        | 1.08 | 2.41                                    | 1.10 | -8.31***                                     | 0.84              | 0.84        |
|                 | 20          | 3.45                                        | 1.05 | 2.54                                    | 1.16 | -10.73***                                    | 0.82              | 0.85        |
|                 | 21          | 3.33                                        | 1.14 | 2.51                                    | 1.05 | -9.61***                                     | 0.81              | 0.80        |
| Trust           | 22          | 3.19                                        | 1.05 | 2.94                                    | 1.13 | -2.94**                                      | 0.74              | 0.83        |
|                 | 23          | 3.68                                        | 0.98 | 2.94                                    | 1.11 | -9.04***                                     | 0.79              | 0.81        |
|                 | 24          | 3.10                                        | 0.87 | 2.78                                    | 1.01 | -4.44***                                     | 0.74              | 0.86        |
|                 | 25          | 3.06                                        | 0.89 | 2.84                                    | 1.09 | -2.88**                                      | 0.70              | 0.86        |
|                 | 26          | 2.89                                        | 1.13 | 2.51                                    | 0.95 | -4.84***                                     | 0.79              | 0.83        |
|                 | 27          | 2.98                                        | 1.00 | 2.84                                    | 1.08 | -1.73                                        | 0.70              | 0.81        |

All questions are listed in Table S2. Values range from "do not agree at all" (1) to "do not agree" (2), "neutral" (3), "agree" (4), and "totally agree" (5). \**P* ≤ 0.05; \*\**P* ≤ 0.01; \*\*\**P* ≤ 0.01.

<sup>a</sup>Factor pattern >0.40; the confirmatory factor analysis results were run separately with the maximum likelihood factor analysis of oblique promax rotation.

**Table S4. Median acceptable frequencies of nuclear events questionnaire: General criteria for rating events in INES**

| Description (INES level)             | People and the environment                                                                                                                                              | Radiological barriers and controls at facilities                                                                                                                                                                                    | Defense in depth                                                                                                                                                                                                                                      |
|--------------------------------------|-------------------------------------------------------------------------------------------------------------------------------------------------------------------------|-------------------------------------------------------------------------------------------------------------------------------------------------------------------------------------------------------------------------------------|-------------------------------------------------------------------------------------------------------------------------------------------------------------------------------------------------------------------------------------------------------|
| Major accident (7)                   | Major release of radioactive material with widespread health and environmental effects requiring implementation of planned and extended countermeasures                 |                                                                                                                                                                                                                                     |                                                                                                                                                                                                                                                       |
| Serious accident (6)                 | Significant release of radioactive material likely to require implementation of planned countermeasures                                                                 |                                                                                                                                                                                                                                     |                                                                                                                                                                                                                                                       |
| Accident with wider consequences (5) | Limited release of radioactive material likely to require implementation of some planned countermeasures<br>Several deaths from radiation                               | Severe damage to reactor core<br><br>Release of large quantities of radioactive material within an installation with a high probability of significant public exposure. This might arise from a major criticality accident or fire. |                                                                                                                                                                                                                                                       |
| Accident with local consequences (4) | Minor release of radioactive material unlikely to result in implementation of planned countermeasures other than local food controls<br>At least 1 death from radiation | Fuel melt or damage to fuel resulting in more than 0.1% release of core inventory<br><br>Release of significant quantities of radioactive material within an installation, with a high probability of significant public exposure   |                                                                                                                                                                                                                                                       |
| Serious incident (3)                 | Exposure in excess of 10x the statutory annual limit for workers.<br><br>Nonlethal deterministic health effect (e.g., burns) from radiation                             | Exposure rates >1 Sv/h in an operating area<br><br>Severe contamination in an area not expected by design, with a low probability of significant public exposure                                                                    | Near-accident at a nuclear power plant, with no safety provisions remaining<br>Lost or stolen highly radioactive sealed source<br><br>Misdelivered highly radioactive sealed source without adequate radiation procedures in place to handle it       |
| Incident (2)                         | Exposure of a member of the public in excess of 10 mSv.<br>-Exposure of a worker in excess of the statutory annual limits.                                              | Radiation levels >50 mSv/h in an operating area<br>Significant contamination within the facility into an area not expected by design                                                                                                | Significant failures in safety provisions but with no actual consequences<br>Found highly radioactive sealed orphan source, device, or transport package, with safety provisions intact<br>Inadequate packaging of a highly radioactive sealed source |
| Anomaly Level 1                      |                                                                                                                                                                         |                                                                                                                                                                                                                                     | Overexposure of a member of the public in excess of statutory limits<br>Minor problems with safety components, with significant defense in depth remaining<br>Low-activity lost or stolen radioactive source, device, or transport package            |
| Below scale/Level 0*                 |                                                                                                                                                                         |                                                                                                                                                                                                                                     |                                                                                                                                                                                                                                                       |

Nuclear events are ranked in seven levels according to the International Nuclear Event Scale (INES) User's Manual.  
\*No safety significance.

**Table S5. Median acceptable frequencies of nuclear events questionnaire: Summary results**

| Please choose your attitudes toward the following probable frequency of nuclear events in Tianwan nuclear power plant: | Respondents accepting the risk frequency, %* |
|------------------------------------------------------------------------------------------------------------------------|----------------------------------------------|
| <b>Level 1: anomaly</b>                                                                                                |                                              |
| One anomaly event (level 1) in every 3 mo                                                                              | 10.10                                        |
| One anomaly event (level 1) in every 6 mo                                                                              | 12.00                                        |
| One anomaly event (level 1) in every 1 y                                                                               | 19.20                                        |
| One anomaly event (level 1) in every 3 y                                                                               | 27.40                                        |
| One anomaly event (level 1) in every 5 y                                                                               | 31.30                                        |
| One anomaly event (level 1) in every 10 y                                                                              | 43.80                                        |
| One anomaly event (level 1) in every 50 y                                                                              | 49.60                                        |
| One anomaly event (level 1) in every 100 y                                                                             | 55.00                                        |
| <b>Level 2: incident</b>                                                                                               |                                              |
| One incident (level 2) in every 6 mo                                                                                   | 9.60                                         |
| One incident (level 2) in every 1 y                                                                                    | 10.60                                        |
| One incident (level 2) in every 2.5 y                                                                                  | 16.30                                        |
| One incident (level 2) in every 5 y                                                                                    | 29.80                                        |
| One incident (level 2) in every 7 y                                                                                    | 33.20                                        |
| One incident (level 2) in every 10 y                                                                                   | 39.40                                        |
| One incident (level 2) in every 50 y                                                                                   | 42.20                                        |
| One incident (level 2) in every 100 y                                                                                  | 50.20                                        |
| <b>Level 3: serious incident</b>                                                                                       |                                              |
| One serious incident (level 3) in every 1 y                                                                            | 4.30                                         |
| One serious incident (level 3) in every 2 y                                                                            | 11.50                                        |
| One serious incident (level 3) in every 3 y                                                                            | 17.30                                        |
| One serious incident (level 3) in every 7 y                                                                            | 26.00                                        |
| One serious incident (level 3) in every 10 y                                                                           | 28.80                                        |
| One serious incident (level 3) in every 20 y                                                                           | 40.90                                        |
| One serious incident (level 3) in every 100 y                                                                          | 41.80                                        |
| One serious incident (level 3) in every 200 y                                                                          | 50.60                                        |

Nuclear events are ranked in seven levels according to the International Nuclear Event Scale (INES) User's Manual. \*Percent of respondents accepting the risk frequency is calculated as the proportion of respondents who chose "fully accept," "easy to accept," or "basically accept" on the questionnaire.

**Table S6. Goodness-of-fit statistics before and after Fukushima**

| Items              | RMSEA | NNFI | CFI  |
|--------------------|-------|------|------|
| Before FNA         | 0.080 | 0.98 | 0.98 |
| After FNA          | 0.058 | 0.99 | 0.99 |
| Reference standard | <0.08 | >0.9 | >0.9 |

CFI, comparative fit index; FNA, Fukushima nuclear accident; NNFI, non-normed fit index; RMSEA, root mean square error of approximation.
